# Supplementary material for: Application of the QuEChERS method combined with UHPLC-QqQ-MS/MS for the determination of isoprocarb and carbaryl pesticides in Indonesian coffee
Source: Royal Society of Chemistry journal article supplement (doi:10.1039/d4ay00243a), 2024-01-01
Supplement: d4ay00243a1.pdf [file d4ay00243a1.pdf]

---

## Supplementary Information

---

### Application of the QuEChERS method combined with UHPLC-QqQ-MS/MS for the determination of isoprocarb and carbaryl pesticides in Indonesian coffee

Harmoko Harmoko,<sup>a,b</sup> Hasim Munawar,<sup>c</sup> Syaiful Bahri,<sup>d</sup> Nuri Andarwulan,<sup>e</sup> Daryono Hadi Tjahjono,<sup>a</sup> Rahmana Emran Kartasasmita,<sup>a</sup> and Amadeo R. Fernández-Alba<sup>\*f</sup>

---

<sup>a</sup> Department of Pharmaceutical Chemistry, School of Pharmacy, Bandung Institute of Technology, Jalan Ganesha 10, Bandung 40132, Indonesia

<sup>b</sup> Directorate of Standardization and Quality Control, Ministry of Trade, Republic of Indonesia, Jl. Raya Bogor Km. 26, Ciracas, Jakarta Timur 13740, Indonesia

<sup>c</sup> Research Center for Chemistry, National Research and Innovation Agency, Gd. 452 Kawasan PUSPIPTEK, Serpong, Tangerang Selatan, Banten 15314, Indonesia

<sup>d</sup> Department of Chemistry, Universitas Lampung Jl. Soemantri Brojonegoro No.1 Gedung Meneng, Bandar Lampung 35145

<sup>e</sup> Department of Food Science and Technology, Faculty of Agricultural Engineering and Technology, IPB University (Bogor Agricultural University), Darmaga Campus, Bogor, 16680, Indonesia

<sup>f</sup> European Union Reference Laboratory for Pesticide Residues in Fruit & Vegetables, Agrifood Campus of International Excellence (ceiA3), Department of Chemistry and Physics, University of Almería, Ctra. Sacramento s/n, La Cañada de San Urbano, Almería, Spain. E-mail: amadeo@ual.es

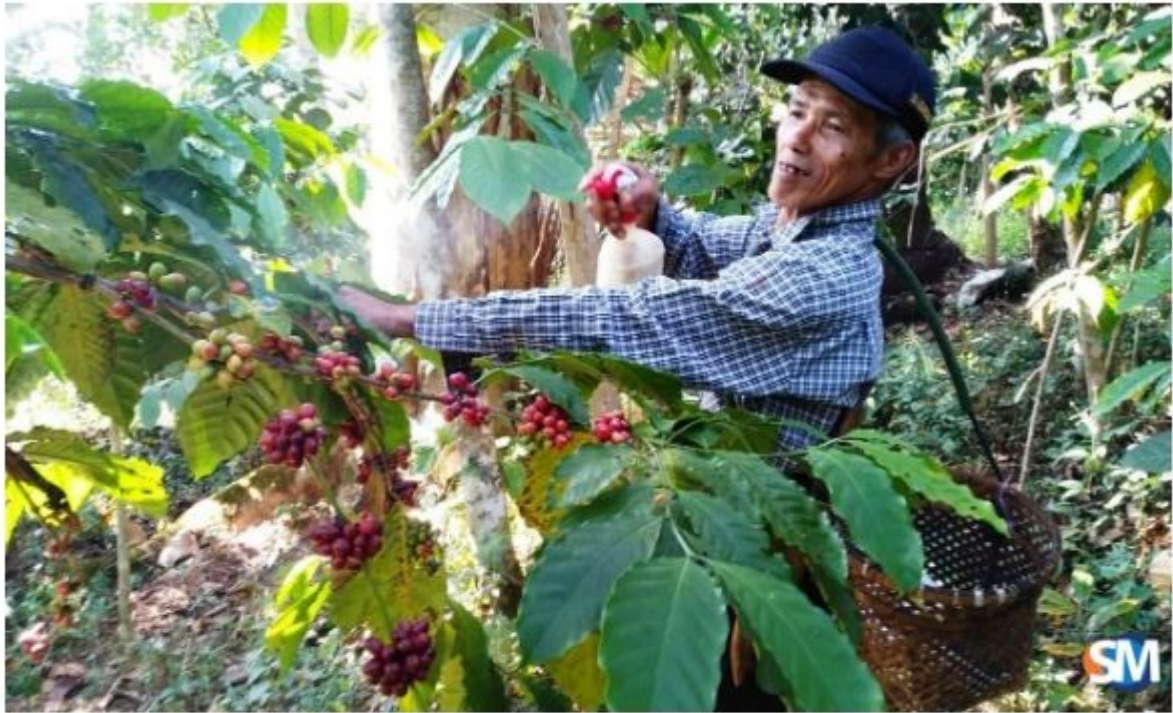

SEMPROT SEMUT: Petani kopi melakukan penyemprotan semut hitam sebelum melakukan pemanenan kopi di lahan miliknya di Dusun Kluwung Desa Kemiriombo Kecamatan Gemawang, Temanggung, kemarin. (suaramerdeka.com/M Abdul Rohman)

27

28 Fig. S1. Photo of the farmer spraying insecticides on coffee plants before harvesting

29

30

31

32

33

34

35

36

37

38

39

40

41 Table S1 The MRM parameter of pesticide tested in LC-MS/MS

| Pesticide              | Precursor ion | Quantifier ion | Qualifier ion |
|------------------------|---------------|----------------|---------------|
| (Monceren) Penycuron   | 329.1         | 125.0          | 218.1         |
| 3-Hydroxycarbofuran    | 238.1         | 163            | 181           |
| Acephate               | 184.1         | 143            | 49            |
| Acetamiprid            | 223           | 126            | 99            |
| Acetochlor             | 270.1         | 59.2           | 148.2         |
| Acibenzolar-S-methyl   | 211           | 136.2          | 91.2          |
| Alachlor               | 270           | 238            | 162           |
| Aldicarb               | 208.1         | 116            | 89            |
| Aldicarb sulfone       | 240.1         | 86.2           | 148.2         |
| Aldicarb sulfoxide     | 207.1         | 132.1          | 89.1          |
| Ametryn                | 228.1         | 186.1          | 96            |
| Aminocarb              | 209.1         | 137.1          | 152           |
| Amitraz                | 294.2         | 148.3          | 91.2          |
| Anilofos               | 368           | 198.9          | 124.9         |
| Atrazine               | 216.1         | 174.1          | 104.1         |
| Azinophos ethyl        | 318           | 132            | 160.2         |
| Azoxystrobin           | 404.1         | 372.1          | 344.1         |
| Benalaxyl              | 326.2         | 294.1          | 148.1         |
| Bendiocarb             | 224.1         | 167.1          | 109           |
| Bentazone              | 241.0         | 199.0          | 107.0         |
| Benzoximate            | 364           | 199            | 105           |
| Bifenazate             | 301.1         | 170.1          | 198.1         |
| Bitertanol             | 338.2         | 269.2          | 70            |
| Boscalid               | 343           | 307            | 140           |
| Bromacil               | 261           | 205            | 188           |
| Bromucanazole Isomer 1 | 378           | 159            | 70            |
| Bromucanazole Isomer 2 | 378.001       | 159            | 70            |
| Bupirimate             | 317           | 166.1          | 108           |
| Buprofezin             | 306.2         | 201.1          | 116.2         |
| Butafenacil            | 492.1         | 331            | 349           |
| Butocarboxim           | 213.1         | 75.1           | 116           |
| Butoxycarboxim         | 223.1         | 106            | 166           |
| Carbaryl               | 202.1         | 145            | 127           |
| Carbendazim            | 192.2         | 160.2          | 132.1         |
| Carbetamide            | 237.1         | 192            | 118.1         |
| Carbofuran             | 222.1         | 165.1          | 123           |
| Carbosulfan            | 381           | 118            | 160           |
| Carboxin               | 236.1         | 143            | 87            |
| Carfentrazone-ethyl    | 412           | 346            | 366           |
| Chlorantraniliprole    | 484.0         | 452.9          | 285.9         |
| Chlorfluazuron         | 540           | 383            | 158           |
| Chlorotoluron          | 213.1         | 72.2           | 46.2          |

|                         |         |       |       |
|-------------------------|---------|-------|-------|
| Chloroxuron             | 291.1   | 72.4  | 218.1 |
| Chlorpyrifos            | 350     | 97    | 198   |
| Chlorpyrifos-methyl     | 321.9   | 125.1 | 289.9 |
| Clethodim Isomer 1      | 360.1   | 164   | 268.1 |
| Clethodim Isomer 2      | 360.101 | 164   | 268.1 |
| Clofentezine            | 303     | 138   | 102   |
| Clothianidin            | 250     | 169   | 132   |
| Cyanazine               | 241     | 214   | 104   |
| Cyazofamid              | 325.2   | 108   | 261.2 |
| Cycloxydim              | 326.1   | 280.1 | 180.0 |
| Cycluron                | 199.1   | 89.1  | 89    |
| Cymoxanil               | 198.9   | 128.2 | 111.2 |
| Cyproconazole Isomer 1  | 292     | 70    | 125   |
| Cyproconazole Isomer 2  | 292.001 | 70    | 125   |
| Cyprodinil              | 226     | 93    | 77    |
| Cyromazine              | 167.1   | 85.1  | 125.1 |
| Desmedipham             | 318.1   | 182   | 154   |
| Diazinon                | 305     | 169   | 97    |
| Dichlorvos              | 221     | 109   | 127   |
| Diclobutrazol           | 328.2   | 70.2  | 59.1  |
| Diclotophos             | 238.1   | 193   | 112.1 |
| Diethofencarb           | 268.1   | 226.1 | 124   |
| Difenoconazole Isomer 1 | 408.2   | 253.1 | 251.1 |
| Difenoconazole Isomer 2 | 408.202 | 253.1 | 251.1 |
| Diflubenzuron           | 311     | 158.2 | 141.1 |
| Dimethoate              | 230     | 199   | 125   |
| Dimethomorph Isomer 1   | 388.1   | 301   | 165.1 |
| Dimethomorph Isomer 2   | 388.101 | 301   | 165.1 |
| Dimoxystrobin           | 327.1   | 116   | 205   |
| Diniconazole            | 326.2   | 70.2  | 159   |
| Dinotefuran             | 203.1   | 129.2 | 157.2 |
| Dioxacarb               | 224.1   | 167   | 123   |
| Diuron                  | 233.1   | 72    | 72.1  |
| Emamectin-benzoate b1a  | 886.5   | 158.1 | 82.1  |
| Emamectin-benzoate b1b  | 872.6   | 158.2 | 302.3 |
| Epoxiconazole           | 330     | 121.1 | 101.1 |
| Etaconazole Isomer 1    | 328.1   | 159   | 205   |
| Etaconazole Isomer 2    | 328.101 | 159   | 205   |
| Ethiofencarb            | 226.1   | 107.2 | 164   |
| Ethion                  | 385     | 199   | 171   |
| Ethiprole               | 397.3   | 350.9 | 255.2 |
| Ethirimol               | 210.2   | 140.1 | 98.1  |
| Ethofumesate            | 287.1   | 259.1 | 121.1 |
| Etoxazole               | 360.1   | 141   | 57.2  |
| Famoxadone              | 392     | 331   | 238   |
| Fenamidone              | 312.1   | 92    | 236.1 |

|                       |         |       |       |
|-----------------------|---------|-------|-------|
| Fenarimol             | 331     | 268   | 81    |
| Fenazaquin            | 307.1   | 161.1 | 147   |
| Fenbuconazole         | 337     | 124.9 | 70    |
| Fenhexamid            | 302     | 97    | 55    |
| Fenitrothion          | 278.1   | 125   | 108.9 |
| Fenobucarb            | 208.2   | 95.3  | 152.1 |
| Fenoxycarb            | 302.1   | 116.1 | 88    |
| Fenpropathrin         | 350     | 125   | 97    |
| Fenpropimorph         | 304     | 147   | 117   |
| Fenpyroximate         | 422     | 366.1 | 135.1 |
| Fenthion              | 279     | 169   | 247   |
| Fenuron               | 165.1   | 72.1  | 46    |
| Fipronil              | 437.1   | 368   | 290   |
| Flonicamid            | 230.1   | 203.1 | 174.0 |
| Flubendiamide         | 683.1   | 408   | 274.1 |
| Flufenacet            | 364.1   | 152.1 | 194.2 |
| Flufenoxuron          | 489     | 158   | 141.1 |
| Fluometuron           | 233.1   | 72.1  | 46    |
| Fluoxastrobin         | 459.2   | 427.2 | 188   |
| Fluquinconazole       | 376     | 307   | 349   |
| Flusilazole           | 316.1   | 165.1 | 247.1 |
| Flutolanil            | 324.1   | 242.1 | 262.1 |
| Flutriafol            | 302.1   | 70.1  | 123   |
| Forchlorfenuron       | 248     | 129.1 | 93.1  |
| Formetanate HCl       | 222.1   | 165   | 120   |
| Fuberidazole          | 185     | 157   | 65    |
| Furalaxyl             | 302.1   | 242.1 | 95    |
| Furathiocarb          | 383.1   | 195.1 | 252.1 |
| Halofenozide          | 331.2   | 105.0 | 275.1 |
| Hexaconazole          | 314.1   | 70    | 159   |
| Hexaflumuron          | 461.1   | 158.2 | 141.1 |
| Hexythiazox           | 353.1   | 168   | 228   |
| Hydramethylnon        | 495.2   | 323.2 | 151.1 |
| Imazalil              | 297     | 159   | 201   |
| Imazapic              | 276.1   | 231.1 | 86    |
| Imazaquin             | 312.1   | 199.1 | 128.1 |
| Imidacloprid          | 256     | 209.1 | 175.1 |
| Indoxacarb            | 528     | 203   | 218   |
| Ipconazole Isomer 1   | 334.2   | 70    | 125   |
| Ipconazole Isomer 2   | 334.201 | 70    | 125   |
| Iprodione             | 330     | 101   | 143   |
| Iprovalicarb Isomer 1 | 321.2   | 119   | 203.1 |
| Iprovalicarb Isomer 2 | 321.201 | 119   | 203.1 |
| Isazophos             | 314     | 120   | 162   |
| Isoprocab             | 194.1   | 95    | 137   |
| Isoprothiolane        | 291.0   | 231.1 | 189   |

|                    |         |       |       |
|--------------------|---------|-------|-------|
| Isoproturon        | 207.2   | 72.1  | 46.1  |
| Kresoxim-methyl    | 314.2   | 116.1 | 131.2 |
| Linuron            | 249.1   | 182.1 | 160   |
| Lufenuron          | 511.1   | 158.1 | 141.2 |
| Malathion          | 331     | 127   | 99    |
| Mandipropamid      | 412.1   | 328.1 | 356.1 |
| MCPA               | 318     | 227   | 101   |
| Mefenacet          | 299     | 148.1 | 120.1 |
| Mepanipyrim        | 224     | 106   | 77    |
| Mepronil           | 270.1   | 119.1 | 228   |
| Mesotrione         | 340.2   | 228.2 | 104.1 |
| Metaflumizone      | 507.1   | 178.1 | 287.1 |
| Metalaxyl          | 280.1   | 220.2 | 192.2 |
| Metamifop          | 441.1   | 288   | 180.2 |
| Metconazole        | 320.1   | 70    | 125   |
| Methabenzthiazuron | 222.1   | 165.2 | 150.3 |
| Methamidophos      | 142     | 94    | 125   |
| Methidathion       | 303     | 145   | 85    |
| Methiocarb         | 226.1   | 169.1 | 121.1 |
| Methomyl           | 163.1   | 106   | 88.1  |
| Methoprotryne      | 272.2   | 198   | 240.2 |
| Methoxyfenozone    | 369.1   | 313.2 | 149.1 |
| Metobromuron       | 259     | 170.2 | 148.2 |
| Metolachlor        | 284.1   | 252.0 | 176.1 |
| Metribuzin         | 215.1   | 187.1 | 84.1  |
| Metsulfuron Methyl | 382     | 167   | 199   |
| Mevinphos Isomer 1 | 225.1   | 127.1 | 193.2 |
| Mevinphos Isomer 2 | 225.101 | 127.1 | 193.2 |
| Mevinphos Isomer 3 | 225.102 | 127.1 | 193.2 |
| Mexacarbate        | 223.2   | 166.1 | 151   |
| Monocrotophos      | 224.1   | 127.1 | 98    |
| Monolinuron        | 215.1   | 126.1 | 99    |
| Myclobutanil       | 289     | 70    | 125   |
| Neburon            | 275     | 88    | 114   |
| Nitenpyram         | 271     | 225.2 | 126   |
| Novaluron          | 493     | 158.1 | 141.1 |
| Nuarimol           | 315     | 252.1 | 81    |
| Omethoate          | 214     | 182.8 | 124.9 |
| Oxadixyl           | 279.1   | 219.1 | 132.1 |
| Oxamyl             | 237.1   | 72.1  | 90.1  |
| Pacllobutrazol     | 294     | 70    | 125   |
| Penconazole        | 284.1   | 70    | 159   |
| Pendimethalin      | 282     | 212   | 194   |
| Phenmedipham       | 301.2   | 168   | 107.9 |
| Phosmet            | 318     | 160   | 133   |
| Phosphamidon       | 300     | 127   | 174   |

|                        |         |       |       |
|------------------------|---------|-------|-------|
| Picoxystrobin          | 368     | 145   | 205   |
| Piperonyl butoxide     | 356.2   | 177.2 | 119.1 |
| Pirimicarb             | 239.2   | 72.1  | 182.1 |
| Pirimiphos methyl      | 306     | 164   | 108   |
| Prochloraz             | 376     | 308   | 70    |
| Profenofos             | 373     | 303   | 97    |
| Promecarb              | 208.1   | 151   | 109   |
| Prometon               | 226.1   | 142   | 86    |
| Prometryne             | 242.2   | 158.1 | 200.1 |
| Propamocarb            | 189.2   | 102   | 144   |
| Propargite             | 368.2   | 231.1 | 175.1 |
| Propazine              | 230.1   | 146   | 188   |
| Propham                | 180.1   | 138   | 120   |
| Propiconazole Isomer 1 | 342.1   | 159   | 69    |
| Propiconazole Isomer 2 | 342.101 | 159   | 69    |
| Propoxur.1             | 210.1   | 111   | 168.1 |
| Propyzamide            | 256     | 190   | 173   |
| Prothioconazole        | 344.1   | 188.9 | 125.1 |
| Pymetrozine            | 218     | 105   | 78    |
| Pyracarbolid           | 218.1   | 125   | 97    |
| Pyraclostrobin         | 388     | 194   | 163   |
| Pyridaben              | 365     | 147   | 309   |
| Pyrimethanil           | 200     | 107   | 82    |
| Pyriproxyfen           | 322     | 96    | 185   |
| Quinoxifen             | 308.1   | 197.1 | 162.1 |
| Rotenone               | 395.1   | 213.1 | 192.1 |
| Secbumeton             | 226.2   | 170.1 | 100   |
| Siduron                | 233.3   | 137.2 | 94    |
| Simazine               | 202     | 132   | 124   |
| Simetryn               | 214     | 124   | 144   |
| Spinetoram             | 748.5   | 142.2 | 98.1  |
| Spinosad (Spinosyn A)  | 732.5   | 142.2 | 98.1  |
| Spinosad (Spinosyn D)  | 746.8   | 142.4 | 98.3  |
| Spirodiclofen          | 411.3   | 71.3  | 313.3 |
| Spiromesifen           | 371.2   | 273.2 | 255.2 |
| Spirotetramat          | 374.2   | 330.2 | 302.2 |
| Spiroxamine Isomer 1   | 298.2   | 144.2 | 100.1 |
| Spiroxamine Isomer 2   | 298.201 | 144.2 | 100.1 |
| Sulfentrazone          | 387     | 307.1 | 146   |
| Tebuconazole           | 308.2   | 70    | 125   |
| Tebufenozide           | 353.2   | 133   | 297.2 |
| Tebufenpyrad           | 334     | 145   | 117   |
| Tebuthiuron            | 229.1   | 172.4 | 116.1 |
| Teflubenzuron          | 381.1   | 141.2 | 158.2 |
| Temephos               | 467     | 419.1 | 405   |
| Terbumeton             | 226.1   | 170.1 | 100   |

|                    |       |       |       |
|--------------------|-------|-------|-------|
| Terbutryn          | 242.1 | 186.1 | 68.1  |
| Tetraconazole      | 372.1 | 159   | 70    |
| Thiabendazole      | 202.1 | 175.1 | 131.2 |
| Thiacloprid        | 253   | 126   | 99    |
| Thiamethoxam       | 292   | 211   | 181   |
| Thidiazuron        | 221.1 | 102.1 | 127.9 |
| Thiobencarb        | 258   | 125   | 89    |
| Thiodicarb         | 355   | 88    | 108   |
| Thiofanox          | 219.2 | 57.2  | 61.1  |
| Thiophanate-methyl | 343   | 151.1 | 311   |
| Tolclofos methyl   | 301   | 175   | 269   |
| Triadimefon        | 294   | 197.1 | 225   |
| Triadimenol        | 296.1 | 70    | 227.1 |
| Trichlorfon        | 256.9 | 109.1 | 127   |
| Tricyclazole       | 190   | 163   | 136   |
| Trifloxystrobin    | 409   | 186   | 206   |
| Triflumizole       | 346.1 | 278.1 | 73    |
| Triflumuron        | 359.1 | 156.2 | 139   |
| Triticonazole      | 318.1 | 70    | 125   |
| Vamidotion         | 288   | 118   | 146   |
| Zoxamide           | 336.1 | 187   | 159   |

42

43

44 Table S2 The operational parameter in GC-MS/MS

| <b>Instrument</b> | <b>GCMS-TQ8050</b>                                                                                                                            |
|-------------------|-----------------------------------------------------------------------------------------------------------------------------------------------|
| Inlet             | 240°C                                                                                                                                         |
| Column            | Splitless injection, sampling time 1 min<br>Elite-5MS, 30 m x 0.25 mm x 0.25 µm<br>Helium carrier gas<br>Linear velocity constant 60.1 cm/sec |
| Oven              | 70°C, hold 2 min<br>25°C/min to 280°C, hold 10 min                                                                                            |
| Ion Source        | 250°C                                                                                                                                         |
| Operation Mode    | Electron ionization (EI) mode, 70 eV<br>Multiple Reaction Monitoring (MRM)<br>Argon gas, 200 kPa                                              |

45

46

47

48

49



50 Table S3 The MRM parameter of pesticide tested in GC-MS/MS

| Pesticide                    | Quantitative transition | Qualitative transition |
|------------------------------|-------------------------|------------------------|
| 2,3,5,6-Tetrachloroaniline   | 228.90>158.00           | 230.90>158.00          |
| 2,4'-Methoxychlor            | 227.10>121.10           | 121.10>78.00           |
| 2-Phenylphenol               | 170.10>141.10           | 141.10>115.10          |
| 3,4-Dichloroaniline          | 161.00>99.00            | 161.00>90.00           |
| 4,4'-Dichlorobenzophenone    | 139.00>111.00           | 139.00>75.00           |
| 4,4'-methoxychlor olefin     | 238.10>223.10           | 308.00>238.10          |
| Acetochlor                   | 174.10>146.10           | 223.10>132.10          |
| Acrinathrin-1                | 181.10>152.10           | 181.10>127.10          |
| Acrinathrin-2                | 181.10>152.10           | 289.10>93.00           |
| Aldrin                       | 262.90>193.00           | 292.90>219.90          |
| Allethrin-3,4 (Bioallethrin) | 123.10>81.10            | 136.10>93.10           |
| Allidochlor                  | 132.10>56.00            | 138.10>96.00           |
| alpha-Endosulfan             | 194.90>160.00           | 194.90>125.00          |
| Anthraquinone                | 208.10>180.10           | 208.10>152.10          |
| Atrazine                     | 200.10>104.10           | 215.10>173.10          |
| Benfluralin                  | 292.10>264.00           | 292.10>160.00          |
| BHC-alpha                    | 180.90>144.90           | 218.90>182.90          |
| BHC-beta                     | 180.90>144.90           | 218.90>182.90          |
| BHC-delta                    | 180.90>144.90           | 218.90>182.90          |
| BHC-gamma                    | 180.90>144.90           | 218.90>182.90          |
| Bifenthrin                   | 181.10>166.10           | 181.10>179.10          |
| Biphenyl                     | 154.10>128.10           | 154.10>115.10          |
| Bromfenvinphos               | 266.90>159.00           | 268.90>161.00          |
| Bromophos                    | 330.90>315.90           | 328.90>313.90          |
| Bromophos-ethyl              | 358.90>302.90           | 302.90>284.90          |
| Bromopropylate               | 340.90>182.90           | 340.90>184.90          |
| Bupirimate                   | 273.10>108.10           | 273.10>193.10          |
| Captafol                     | 79.00>77.00             | 79.00>51.00            |
| Captan                       | 149.10>105.10           | 149.10>79.10           |
| Carbophenothion              | 157.00>45.00            | 341.90>157.00          |
| Carfentrazone-ethyl          | 340.10>312.10           | 312.10>151.10          |
| Chlorbenside                 | 125.00>89.00            | 125.00>99.00           |
| cis-Chlordane                | 374.80>265.90           | 372.80>263.90          |
| trans-Chlordane              | 374.80>265.90           | 372.80>263.90          |
| Chlorfenapyr                 | 247.10>227.00           | 247.10>200.00          |
| Chlorfenson                  | 175.00>111.00           | 175.00>75.00           |
| (E)-Chlorfenvinphos          | 267.00>159.00           | 323.00>267.00          |
| (Z)-Chlorfenvinphos          | 267.00>159.00           | 323.00>267.00          |
| Chlorobenzilate              | 139.00>111.00           | 251.00>139.00          |
| Chloroneb                    | 206.00>191.00           | 206.00>141.00          |
| Chlorothalonil               | 263.90>168.00           | 265.90>168.00          |
| Chlorpropham                 | 127.10>65.00            | 127.10>92.00           |

|                     |               |               |
|---------------------|---------------|---------------|
| Chlorpyrifos        | 196.90>168.90 | 313.90>257.90 |
| Chlorpyrifos-methyl | 285.90>93.00  | 287.90>93.00  |
| Chlorthal-dimethyl  | 298.90>220.90 | 300.90>222.90 |
| Chlozolinate        | 258.90>188.00 | 330.90>258.90 |
| Clomazone           | 204.10>107.00 | 204.10>78.00  |
| Coumaphos           | 362.00>109.00 | 362.00>226.00 |
| Cycloate            | 154.20>83.10  | 154.20>55.00  |
| Cyfluthrin-1        | 163.10>127.10 | 163.10>91.00  |
| Cyfluthrin-2        | 163.10>127.10 | 163.10>91.00  |
| Cyfluthrin-3        | 163.10>127.10 | 163.10>91.00  |
| Cyfluthrin-4        | 163.10>127.10 | 163.10>91.00  |
| Cypermethrin-1      | 181.10>152.10 | 163.10>127.10 |
| Cypermethrin-2      | 163.10>127.10 | 163.10>91.00  |
| Cypermethrin-3      | 163.10>127.10 | 163.10>91.00  |
| Cypermethrin-4      | 163.10>127.10 | 163.10>91.00  |
| Cyprodinil          | 224.10>208.10 | 224.10>197.10 |
| o,p'-DDD            | 235.00>165.00 | 237.00>165.00 |
| o,p'-DDE            | 246.00>176.00 | 248.00>176.00 |
| p,p'-DDE            | 246.00>176.00 | 317.90>248.00 |
| p,p'-DDT            | 235.00>165.00 | 237.00>165.00 |
| Deltamethrin-1      | 180.90>151.90 | 252.90>93.00  |
| Deltamethrin-2      | 180.90>151.90 | 252.90>93.00  |
| Diazinon            | 179.10>122.10 | 179.10>137.10 |
| Dichlofluanid       | 223.90>123.10 | 167.10>124.10 |
| Dicloran            | 206.00>176.00 | 176.00>148.00 |
| Dieldrin            | 262.90>193.00 | 276.90>241.00 |
| Dimethachlor        | 197.10>148.10 | 197.10>120.10 |
| Diphenamid          | 167.10>152.10 | 239.10>167.10 |
| Diphenylamine       | 167.10>139.10 | 169.10>66.00  |
| Disulfoton          | 153.00>97.00  | 153.00>125.00 |
| Endosulfan-beta     | 194.90>160.00 | 194.90>125.00 |
| Endosulfan ether    | 240.90>205.90 | 238.90>203.90 |
| Endosulfan sulfate  | 271.80>236.90 | 386.80>288.80 |
| Endrin              | 262.90>191.00 | 262.90>193.00 |
| Endrin aldehyde     | 249.80>214.90 | 344.90>244.90 |
| Endrin ketone       | 316.90>244.90 | 314.90>242.90 |
| EPN                 | 169.10>140.90 | 156.90>77.00  |
| Ethalfuralin        | 276.00>202.00 | 316.10>276.00 |
| Ethion              | 230.90>129.00 | 153.00>97.00  |
| Etofenprox          | 163.10>135.10 | 163.10>107.10 |
| Fenamiphos          | 303.10>195.10 | 288.10>260.10 |
| Fenarimol           | 251.00>139.00 | 251.00>111.00 |
| Fenchlorphos        | 284.90>269.90 | 286.90>271.90 |
| Fenitrothion        | 277.00>260.00 | 277.00>109.10 |
| Fenpropathrin       | 181.10>152.10 | 265.10>210.10 |
| Fenson              | 141.00>77.00  | 267.90>141.00 |

|                                  |               |               |
|----------------------------------|---------------|---------------|
| Fenthion                         | 278.00>109.00 | 278.00>169.00 |
| Fenvalerate-1                    | 225.10>119.10 | 225.10>147.10 |
| Fenvalerate-2 (Esfenvalerate)    | 225.10>119.10 | 225.10>147.10 |
| Fipronil                         | 366.90>212.90 | 368.90>214.90 |
| Fluazifop-P-butyl                | 282.10>238.10 | 282.10>91.00  |
| Fluchloralin                     | 306.00>264.00 | 326.00>63.00  |
| Flucythrinate-1                  | 157.10>107.10 | 199.10>157.10 |
| Flucythrinate-2                  | 199.10>157.10 | 157.10>107.10 |
| Fludioxonil                      | 248.00>127.00 | 248.00>154.00 |
| Fluquinconazole                  | 340.00>298.00 | 340.00>313.00 |
| Fluridone                        | 328.10>259.00 | 328.10>313.00 |
| Flusilazole                      | 233.10>165.10 | 233.10>152.10 |
| Flutolanil                       | 173.00>145.00 | 173.00>95.00  |
| Flutriafol                       | 219.10>123.10 | 219.10>95.00  |
| Fonofos                          | 137.10>109.10 | 246.00>137.10 |
| Heptachlor                       | 271.80>236.90 | 273.80>238.90 |
| Heptachlor-exo-epoxide           | 352.80>262.90 | 354.80>264.90 |
| Hexachlorobenzene                | 283.80>213.80 | 283.80>248.80 |
| Hexazinone                       | 171.10>71.00  | 171.10>85.00  |
| Isodrin                          | 192.90>157.00 | 192.90>123.00 |
| Isopropalin                      | 280.10>238.10 | 280.10>133.10 |
| lambda-Cyhalothrin               | 181.10>152.10 | 163.10>91.00  |
| Lenacil                          | 153.10>136.10 | 153.10>82.10  |
| Leptophos                        | 376.90>361.90 | 374.90>359.90 |
| Linuron                          | 248.00>61.00  | 250.00>61.00  |
| Malathion                        | 173.10>99.00  | 158.10>125.00 |
| Metalaxyl                        | 206.10>132.10 | 249.20>190.10 |
| Metazachlor                      | 209.10>132.10 | 133.10>117.10 |
| Methacrifos                      | 208.00>180.00 | 208.00>110.00 |
| Methoxychlor                     | 227.10>169.10 | 227.10>141.10 |
| Metolachlor (S-Metolachlor)      | 162.10>133.10 | 238.10>162.10 |
| Mevinphos-1                      | 127.00>109.00 | 192.00>127.00 |
| Mevinphos-2                      | 127.00>109.00 | 192.00>127.00 |
| MGK 264-1                        | 111.10>82.00  | 164.10>93.00  |
| MGK 264-2                        | 164.10>98.00  | 111.10>82.00  |
| Mirex                            | 271.80>236.80 | 273.80>238.80 |
| Myclobutanil                     | 179.10>125.00 | 179.10>152.00 |
| N-(2,4-dimethylphenyl) formamide | 149.10>121.10 | 149.10>106.10 |
| cis-Nonachlor                    | 406.80>299.90 | 406.80>109.00 |
| trans-Nonachlor                  | 406.80>299.90 | 406.80>334.90 |
| Nitralin                         | 316.10>274.00 | 274.00>169.00 |
| Nitrofen                         | 202.00>139.00 | 282.90>253.00 |
| Norflurazon                      | 145.00>95.00  | 303.00>145.00 |
| Oxadiazon                        | 258.00>175.00 | 302.00>175.00 |
| Oxyfluorfen                      | 252.00>196.00 | 361.00>300.00 |
| Paclobutrazol                    | 236.10>125.00 | 236.10>167.00 |

|                              |               |               |
|------------------------------|---------------|---------------|
| Parathion                    | 139.00>109.00 | 291.10>109.00 |
| Parathion-methyl             | 125.00>47.00  | 125.00>79.00  |
| Pebulate                     | 128.10>57.00  | 128.10>72.00  |
| Penconazole                  | 248.10>157.10 | 159.10>123.10 |
| Pendimethalin                | 252.10>162.10 | 252.10>191.10 |
| Pentachloroaniline           | 262.90>191.90 | 264.90>193.90 |
| Pentachloroanisole           | 264.80>236.80 | 279.90>236.80 |
| Pentachlorobenzene           | 249.90>214.90 | 249.90>178.90 |
| Pentachlorobenzonitrile      | 274.80>239.80 | 272.80>202.90 |
| Pentachlorothioanisole       | 295.80>262.90 | 295.80>245.80 |
| Permethrin-1                 | 183.10>153.10 | 183.10>168.10 |
| Permethrin-2                 | 183.10>153.10 | 183.10>168.10 |
| Phenothrin-1                 | 123.10>81.00  | 183.10>153.10 |
| Phenothrin-2                 | 123.10>81.00  | 183.10>153.10 |
| Phorate                      | 231.00>129.00 | 231.00>175.00 |
| Phosalone                    | 182.00>111.00 | 182.00>138.00 |
| Phosmet                      | 160.00>77.00  | 160.00>133.00 |
| Piperonyl butoxide           | 176.10>131.10 | 176.10>103.10 |
| Pirimiphos ethyl             | 304.10>168.10 | 318.10>166.10 |
| Pirimiphos-methyl            | 290.10>125.00 | 290.10>233.10 |
| Pretilachlor                 | 262.10>202.10 | 238.10>162.10 |
| Prochloraz                   | 180.10>138.10 | 180.10>69.00  |
| Procymidone                  | 283.00>96.00  | 285.00>96.00  |
| Prodiamine                   | 321.10>279.10 | 321.10>203.10 |
| Profluralin                  | 318.10>199.10 | 318.10>55.00  |
| Propachlor                   | 120.00>77.00  | 120.00>92.00  |
| Propanil                     | 160.90>99.00  | 160.90>90.00  |
| Propargite-1                 | 135.10>107.10 | 135.10>77.00  |
| Propargite-2                 | 135.10>107.10 | 135.10>77.00  |
| Propisochlor                 | 162.10>120.10 | 162.10>147.10 |
| Propyzamide                  | 172.90>144.90 | 172.90>109.00 |
| Prothiofos                   | 266.90>238.90 | 309.00>238.90 |
| Pyralofos                    | 194.00>138.00 | 360.10>194.00 |
| Pyrazophos                   | 221.10>193.10 | 221.10>149.10 |
| Pyridaben                    | 147.10>117.10 | 147.10>132.10 |
| Pyridaphenthion              | 340.00>199.10 | 199.10>92.00  |
| Pyrimethanil                 | 198.10>183.10 | 198.10>118.10 |
| Pyriproxyfen                 | 136.10>78.00  | 136.10>96.00  |
| Quinalphos                   | 146.10>118.00 | 146.10>91.00  |
| Resmethrin-1                 | 143.10>128.10 | 171.10>128.10 |
| Resmethrin-2 (Bioresmethrin) | 143.10>128.10 | 171.10>143.10 |
| Sulfotep                     | 322.00>202.00 | 322.00>174.00 |
| Sulprofos                    | 156.00>141.00 | 156.00>108.00 |
| tau-Fluvalinate-1            | 250.10>55.00  | 250.10>200.10 |
| tau-Fluvalinate-2            | 250.10>55.00  | 250.10>200.10 |
| Tebuconazole                 | 125.10>89.00  | 250.10>125.10 |

|                              |               |               |
|------------------------------|---------------|---------------|
| Tebufenpyrad                 | 333.10>171.10 | 333.10>276.10 |
| Tecnazene                    | 260.90>202.90 | 202.90>142.90 |
| Tefluthrin                   | 177.00>127.10 | 177.00>137.10 |
| Terbacil                     | 161.00>144.00 | 161.00>88.00  |
| Terbufos                     | 231.00>128.90 | 231.00>174.90 |
| Tetrachlorvinphos            | 328.90>109.00 | 330.90>109.00 |
| Tetradifon                   | 226.90>199.00 | 355.90>228.90 |
| Tetramethrin-1               | 164.10>107.10 | 164.10>77.00  |
| Tetramethrin-2               | 164.10>107.10 | 164.10>77.00  |
| THPI (Tetrahydrophthalimide) | 151.10>79.00  | 151.10>123.10 |
| Tolclofos-methyl             | 264.90>249.90 | 264.90>219.90 |
| Tolyfluanid                  | 238.00>137.10 | 181.10>138.10 |
| Transfluthrin                | 163.10>143.10 | 163.10>127.10 |
| Triadimefon                  | 208.10>181.00 | 208.10>127.00 |
| Triadimenol-1                | 168.10>70.00  | 128.10>65.00  |
| Triadimenol-2                | 168.10>70.00  | 128.10>65.00  |
| Triazophos                   | 161.00>134.00 | 161.00>106.00 |
| Tricyclazole                 | 189.00>161.90 | 189.00>135.00 |
| Triflumizole                 | 206.10>179.10 | 278.10>73.00  |
| Trifluralin                  | 306.10>264.10 | 264.10>160.10 |

51

52

53 Table S4 Validation data and uncertainty estimation of isoprocarb and carbaryl in roasted and

54 brewed coffee

| Pesticide  | Roasted coffee |             |                      |                      |        | Brewed coffee       |            |                      |                      |        |
|------------|----------------|-------------|----------------------|----------------------|--------|---------------------|------------|----------------------|----------------------|--------|
|            | Linear range   | LOQ (mg/kg) | Level 0.001 mg/kg    |                      |        | Linear range (mg/L) | LOQ (mg/L) | Level 0.0001 mg/L    |                      |        |
|            |                |             | Average Recovery (%) | RSD <sub>r</sub> (%) | U' (%) |                     |            | Average Recovery (%) | RSD <sub>r</sub> (%) | U' (%) |
| Isoprocarb | 0.001 – 0.100  | 0.001       | 78.3                 | 17.1                 | 37     | 0.0001 – 0.0050     | 0.0001     | 117.2                | 16.4                 | 39     |
| Carbaryl   | 0.001 – 0.100  | 0.001       | 109.8                | 9.6                  | 36     | 0.0001 – 0.0050     | 0.0001     | 108.9                | 13.2                 | 32     |

55

56

57

58

59

60

61

62

63 Table S5 Occurrence of pesticides in surveyed coffee samples from 3 coffee-producing areas  
64 of Indonesia

| Pesticide detected in the samples | Aceh province (Arabica coffee) |                        |                                      | East Java province (Robusta coffee) |                        |                                      | Lampung province (Robusta coffee) |                        |                                      |
|-----------------------------------|--------------------------------|------------------------|--------------------------------------|-------------------------------------|------------------------|--------------------------------------|-----------------------------------|------------------------|--------------------------------------|
|                                   | n                              | No. of Positive sample | No. of positive samples > 0.01 mg/kg | n                                   | No. of Positive sample | No. of positive samples > 0.01 mg/kg | n                                 | No. of Positive sample | No. of positive samples > 0.01 mg/kg |
| Carbaryl                          | 14                             | –                      | –                                    | 31                                  | –                      | –                                    | 35                                | 5                      | 1                                    |
| Isoprocarb                        |                                | –                      | –                                    |                                     | –                      | –                                    |                                   | 12                     | 3                                    |

65

66 n = number of samples

67 Pesticide analyzed from the sample: (E)-Chlorfenvinphos, (Monceren) Pencycuron, (Z)-Chlorfenvinphos, 2,3,5,6-Tetrachloroaniline, 2,4'-  
68 Methoxychlor, 2-Phenylphenol, 3,4-Dichloroaniline, 3-Hydroxycarbofuran, 4,4'-Dichlorobenzophenone, 4,4'-methoxychlor olefin, Acephate,  
69 Acetamiprid, Acetochlor, Acibenzolar-S-methyl, Acrinathrin, Aldicarb, Aldicarb sulfone, Aldicarb sulfoxide, Aldrin, Allidochlor, alpha-  
70 BHC, alpha-Endosulfan, Ametryn, Aminocarb, Amitraz, Anthraquinone, Atrazine, Azoxystrobin, Benalaxyl, Bendiocarb, Benfluralin,  
71 Benzoximate, beta-BHC, beta-Endosulfan, Bifenazate, Bifenthrin, Biphenyl, Bitertanol, Boscalid, Bromfenvinphos, Bromophos, Bromophos-  
72 ethyl, Bromopropylate, Bromucanazole, Bupirimate, Buprofezin, Butafenacil, Butocarboxim, Butoxycarboxim, Carbaryl, Carbendazim,  
73 Carbetamide, Carbofuran, Carbophenothion, Carboxin, Carfentrazone-ethyl, Chlorantraniliprole, Chlorbenside, Chlorfenapyr, Chlorfenson,  
74 Chlorflauzuron, Chlorobenzilate, Chloroneb, Chlorothalonil, Chlorotoluron, Chloroxuron, Chlorpropham, Chlorpyrifos, Chlorpyrifos-methyl,  
75 Chlorthal-dimethyl, Chlozolinat, cis-Chlordane, cis-Nonachlor, Clethodim Isomer, Clofentezine, Clomazone, Clothianidin, Coumaphos,  
76 Cyazofamid, Cycloate, Cycluron, Cyfluthrin, Cymoxanil, Cypermethrin, Cyproconazole, Cyprodinil, Cyromazine, delta-BHC, Deltamethrin  
77 (Tralomethrin deg.), Desmedipham, Diazinon, Dichlofluanid, Diclobutrazol, Dieloran, Dicrotophos, Dieldrin, Diethofencarb, Difenconazole  
78 , Diflubenzuron, Dimethachlor, Dimethoate, Dimethomorph, Dimoxystrobin, Diniconazole, Dinotefuran, Dioxacarb, Diphenamid,  
79 Diphenylamine, Disulfoton, Diuron, Emamectin-benzoate, Endosulfan ether, Endosulfan sulfate, Endrin, Endrin aldehyde, Endrin ketone,  
80 EPN, Epoxiconazole, Etaconazole, Ethalfluralin, Ethiofencarb, Ethion, Ethiprole, Ethirimol, Ethofumesate, Etofenprox, Etoxazole,  
81 Famoxadone, Fenamidone, Fenamiphos, Fenarimol, Fenazaquin, Fenbuconazole, Fenchlorphos, Fenhexamid, Fenitrothion, Fenobucarb,  
82 Fenoxycarb, Fenpropathrin, Fenpropimorph, Fenpyroximate, Fenson, Fenthion, Fenuron, Fenvalerate, Fipronil, Flonicamid, Fluazifop-P-  
83 butyl, Flubendiamide, Fluchloralin, Flucythrinate, Fludioxonil, Flufenacet, Flufenoxuron, Fluometuron, Fluoxastrobin, Fluquinconazole,  
84 Fluquinconazole, Flusilazole, Flutolanil, Flutriafol, Fonofos, Forchlorfenuron, Formetanate HCl, Fuberidazole, Furalaxyl, Furathiocarb,  
85 gamma-BHC (Lindane), Halofenozide, Heptachlor, Heptachlor-exo-epoxide, Hexachlorobenzene, Hexaconazole, Hexaflumuron,  
86 Hexazinone, Hexythiazox, Hydramethylon, Imazalil, Imidacloprid, Indoxacarb, Iponazole , Iprovalicarb, Isodrin, Isoprocarb, Isopropalin,  
87 Isoproturon, Kresoxim-methyl, lambda-Cyhalothrin, Lenacil, Leptophos, Linuron, Lufenuron, Malathion, Mandipropamid, Mefenacet,  
88 Mepanipyrim, Mepronil, Mesotrione, Metaflumizone, Metalaxyl, Metazachlor, Metconazole, Methabenzthiazuron, Methacrifos,  
89 Methamidophos, Methiocarb, Methomyl, Methoprotrotrine, Methoxychlor, Methoxyfenozide, Metobromuron, Metolachlor (S-Metolachlor),  
90 Metribuzin, Mevinphos, Mevinphos , Mexacarbate, MGK 264, Mirex, Monocrotophos, Monolinuron, Myclobutanil, Neburon, Nitenpyram,  
91 Nitralin, Nitrofen, Norflurazon, Novaluron, Nuarimol, o,p'-DDD, o,p'-DDE, Omethoate, Oxadiazon, Oxadixyl, Oxamyl, Oxyfluorfen, p,p'-  
92 DDE, p,p'-DDT, Paclbutrazol, Parathion, Parathion-methyl, Pebulate, Penconazole, Pendimethalin, Pentachloroaniline, Pentachloroanisole,  
93 Pentachlorobenzene, Pentachlorobenzonitrile, Pentachlorothioanisole, Permethrin, Phenmedipham, Phenothrin, Phorate, Phosalone, Phosmet,  
94 Picoxystrobin, Piperonyl butoxide, Pirimicarb, Pirimiphos ethyl, Pirimiphos-methyl, Pretilachlor, Prochloraz, Procymidone, Prodiamine,  
95 Profluralin, Promecarb, Prometon, Prometryne, Propachlor, Propamocarb, Propanil, Propargite, Propham, Propiconazole, Propisochlor,  
96 Propoxur, Propyzamide, Prothioconazole, Prothiofos, Pymetrozine, Pyracarbolid, Pyraclofos, Pyraclostrobin, Pyrazophos, Pyridaben,  
97 Pyridaphenthion, Pyrimethanil, Pyriproxyfen, Pyriproxyfen, Quinalphos, Quinoxifen, Resmethrin, Rotenone, Sebumeton, Siduron,  
98 Simetryn, Spinetoram, Spinosad (Spinosyn D), Spirodiclofen, Spirotetramat, Spiroxamine , Sulfentrazone, Sulfotep, Sulprofos, tau-  
99 Fluvalinate, Tebuconazole, Tebufenozide, Tebufenpyrad, Tebuthiuron, Tecnazene, Teflubenzuron, Tefluthrin, Temephos, Terbacil, Terbufos,  
100 Terbumeton, Terbutryn, Tetrachlorvinphos, Tetraconazole, Tetradifon, Tetramethrin, Thiabendazole, Thiocloprid, Thiamethoxam,  
101 Thidiazuron, Thiobencarb, Thiofanox, Thiophanate-methyl, THPI (Tetrahydrophthalimide), Tolclofos-methyl, Tolyfluanid, trans-Chlordane,  
102 Transfluthrin, trans-Nonachlor, Triadimefon, Triadimenol, Triazophos, Trichlorfon, Tricyclazole, Trifloxystrobin, Triflumizole, Triflumuron,  
103 Trifluralin, Triticonazole, Vamidothion, Zoxamide.

104

105

106

107

108

109

110

111

112
